# Supplementary material
Source: publisher figshare collection journal article supplement (https://karger.figshare.com/ndownloader/files/29238609)
Supplement: Supplementary file 1 [file 29238609]

**Suppl Table 1: Subject pretreatment**

| **Subject** | **Dose**  **(mg/kg)** | **Cycle 1** | **Cycle 2** | **Cycle 3** | **Cycle 4** | **Cycle 5** | **Cycle 6** | **Cycle 7** | **Cycle 8** |
| --- | --- | --- | --- | --- | --- | --- | --- | --- | --- |
| Subject 1 | 0.3 | None | H1 antagonist, steroid | **-** | **-** | **-** | **-** | **-** | **-** |
| Subject 2 | 0.3 | Acetaminophen*,  H1 antagonist, H2 antagonist | | | | **-** | **-** | **-** | **-** |
| Subject 4 | 0.3 | None | Acetaminophen*,  H1 antagonist, H2 antagonist | | | | Acetaminophen, H1 antagonist, H2 antagonist, steroid | Acetaminophen, H1 antagonist, steroid | |
| Subject 5 | 0.3 | Acetaminophen*,  H1 antagonist, H2 antagonist | | Acetaminophen, H1 antagonist, steroid | | | | | |
| Subject 7 | 0.3 | Acetaminophen*,  H1 antagonist, H2 antagonist | | **-** | **-** | **-** | **-** | **-** | **-** |
| Subject 9 | 0.3 | Acetaminophen*,  H1 antagonist, H2 antagonist | Acetaminophen*,  H1 antagonist, H2 antagonist, steroid | | **-** | **-** | **-** | **-** | **-** |
| Subject 3 | 0.75 | Acetaminophen, H1 antagonist, steroid | - | **-** | **-** | **-** | **-** | **-** | **-** |
| Subject 6 | 0.75 | Acetaminophen, H1 antagonist, steroid | - | **-** | **-** | **-** | **-** | **-** | **-** |
| Subject 8 | 0.75 | Acetaminophen, H1 antagonist, steroid | - | **-** | **-** | **-** | **-** | **-** | **-** |

*pre- and approx. 5h post-HKT288 dose
